# Supplementary material for: Enhancing the stability of metal–organic framework via ligand modification: scalable synthesis and high selectivity of CO2 sorption property
Source: Royal Society of Chemistry journal article supplement (doi:10.1039/d2ce01496c), 2022-12-06
Supplement: d2ce01496c1.pdf [file d2ce01496c1.pdf]

## Supporting Information

### **Enhancing stability of Metal–Organic Framework via ligand modification: scalable synthesis and highly selectivity of CO<sub>2</sub> sorption property**

**Di-Ming Chen\*, Xue-Jing Zhang**

*Henan Provincial Key Laboratory of Surface & Interface Science, Zhengzhou University of Light  
Industry, Zhengzhou 450002, P. R. China*

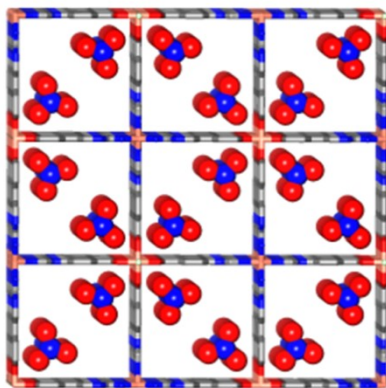

**Fig S1.** The location of  $\text{NO}_3^-$  in the framework of **1**.

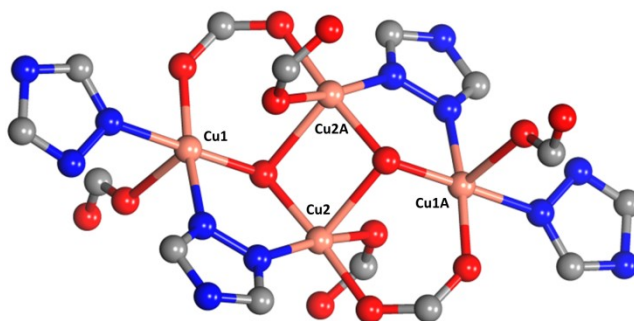

**Fig S2.** The coordination environment of the  $\text{Cu}^{2+}$  ions in the tetranuclear copper cluster (Symmetry code A:  $1-x, -y, 1-z$ ).

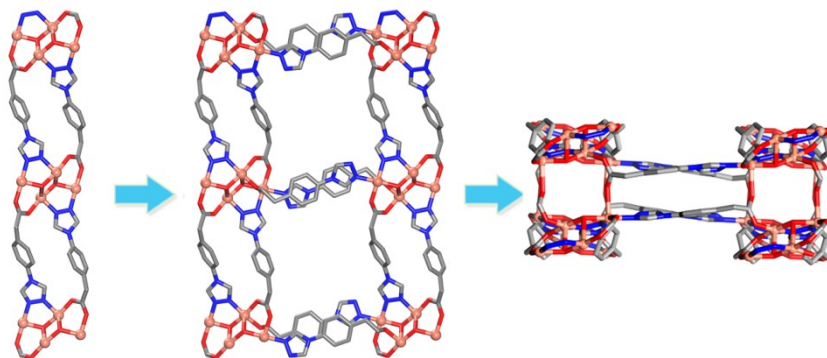

**Fig S3.** The schematic representation of the formation of the double-walled structure of **2**.

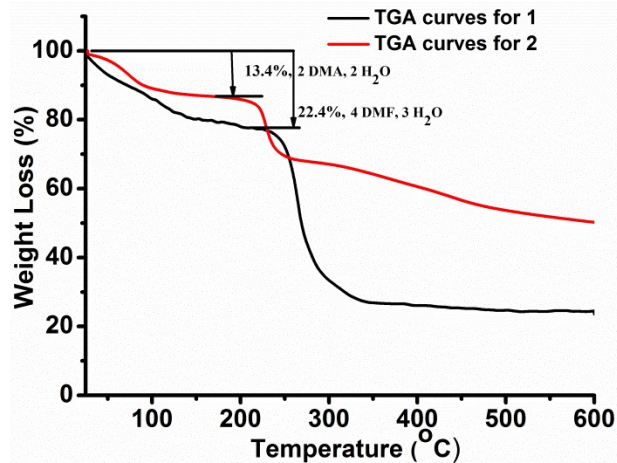

Fig S4. The TG curves for the single-walled **1** and double-walled **2**.

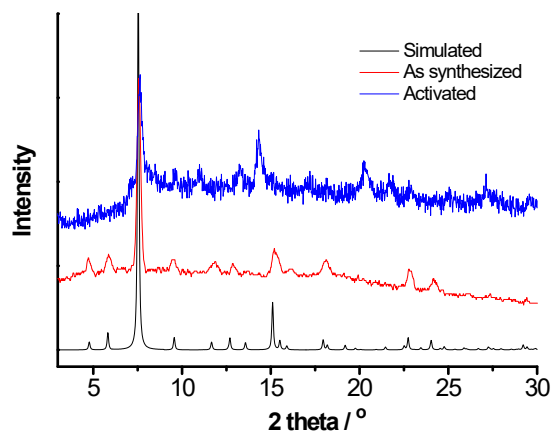

Fig S5. Powder X-ray diffraction (PXRD) patterns of **1**: pattern simulated from single-crystal structure in black, experimental pattern for the as-synthesized sample in red, experimental pattern for the activated sample in blue.

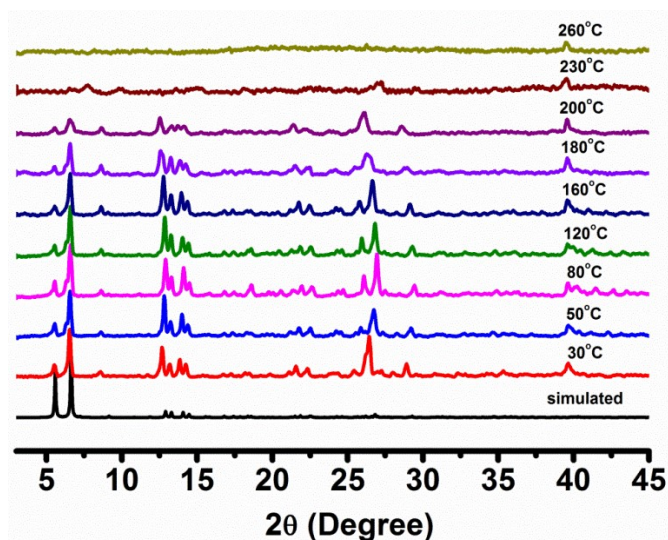

Fig S6. Variable temperature PXRD pattern of double-walled **2**.

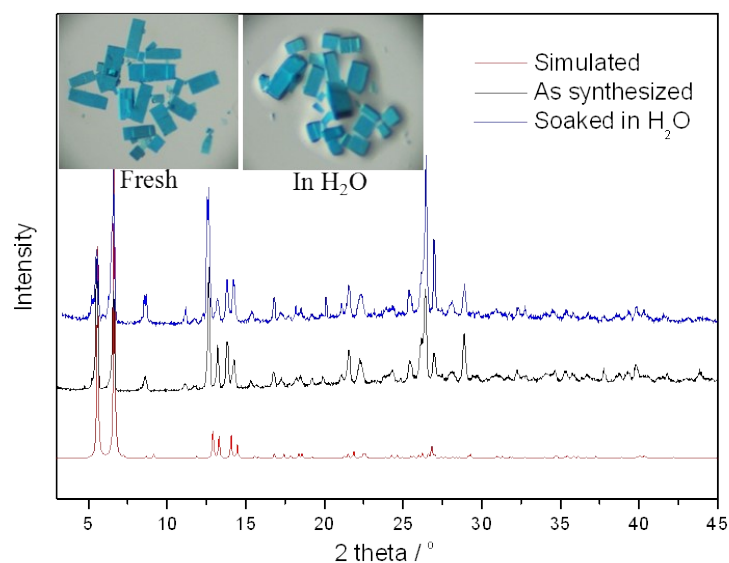

**Fig S7.** PXRD patterns of **2**: pattern simulated from single-crystal structure in red, experimental pattern for the as-synthesized sample in black, experimental pattern for the sample soaked in H<sub>2</sub>O in blue. Insert photos for **2** as synthesized and soaked in H<sub>2</sub>O.

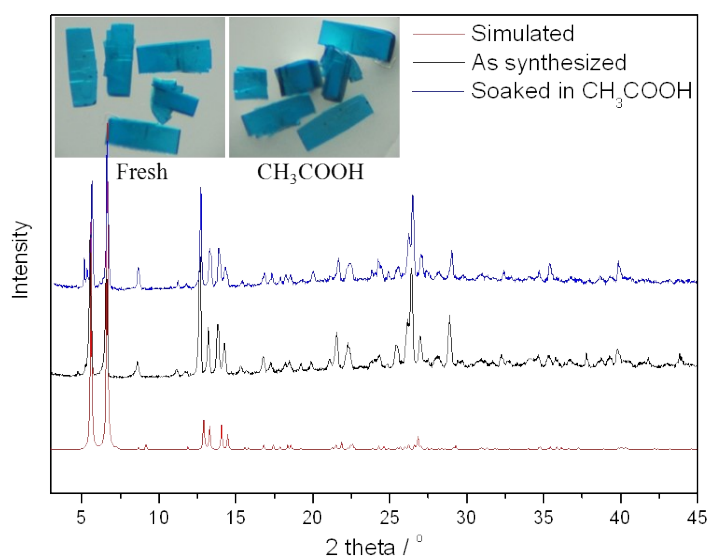

**Fig S8.** PXRD patterns of **2**: pattern simulated from single-crystal structure in red, experimental pattern for the as-synthesized sample in black, experimental pattern for the sample soaked in CH<sub>3</sub>COOH in blue. Insert photos for **2** as synthesized and soaked in CH<sub>3</sub>COOH.

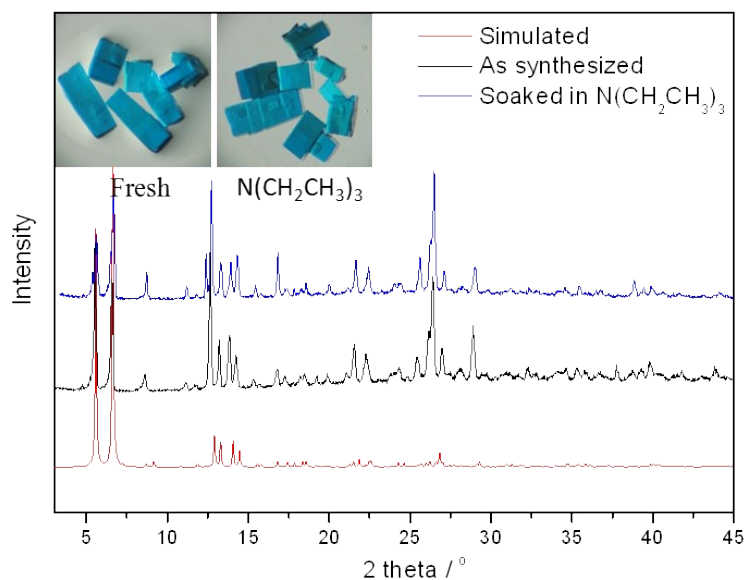

**Fig S9.** PXRD patterns of **2**: pattern simulated from single-crystal structure in red, experimental pattern for the as-synthesized sample in black, experimental pattern for the sample soaked in  $\text{N}(\text{CH}_2\text{CH}_3)_3$  in blue. Insert photos for **2** as synthesized and soaked in  $\text{N}(\text{CH}_2\text{CH}_3)_3$ .

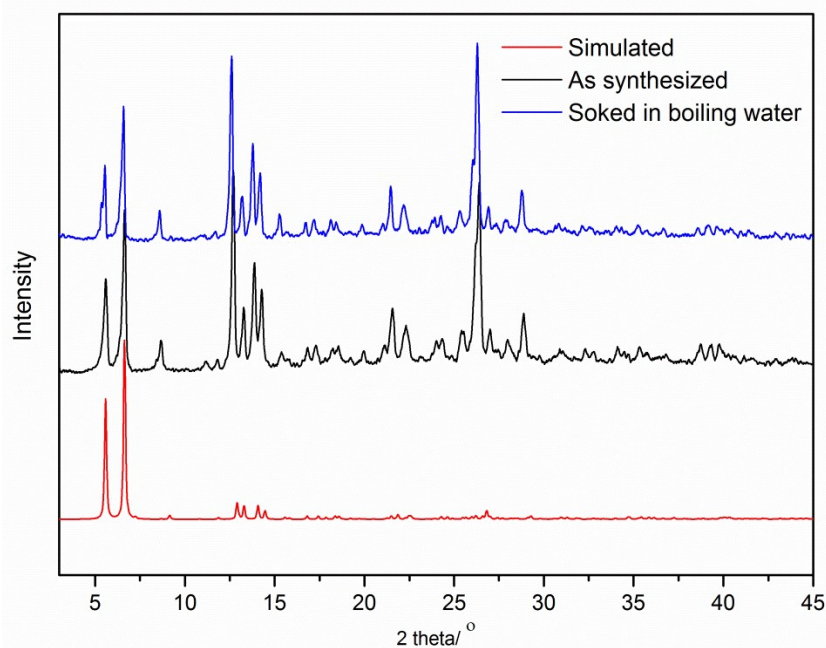

**Fig S10.** PXRD patterns of **2**: pattern simulated from single-crystal structure in red, experimental pattern for the as-synthesized sample in black, experimental pattern for the sample soaked in boiling water in blue.

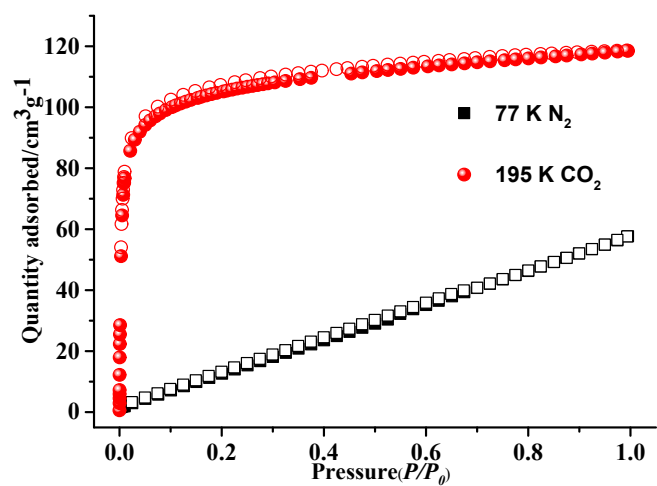

Fig S11. The 195 K CO<sub>2</sub> sorption isotherm and 77 K N<sub>2</sub> sorption isotherm of 2'.

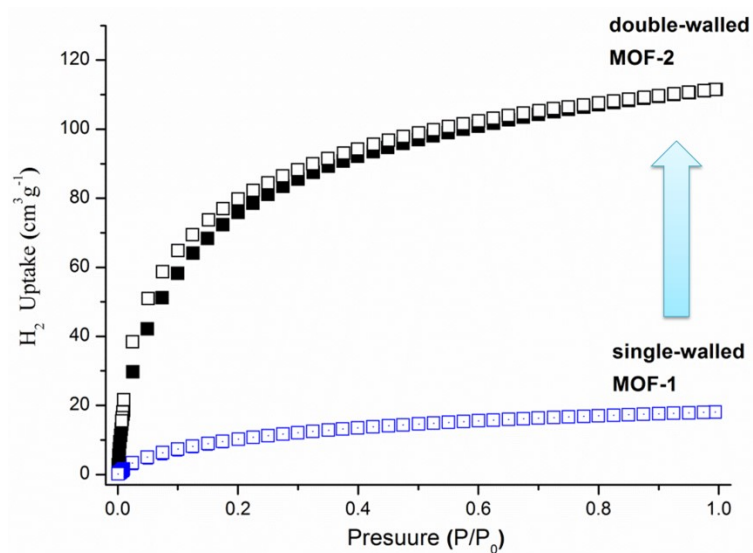

Fig S12. H<sub>2</sub> adsorption isotherms of 1 and 2.

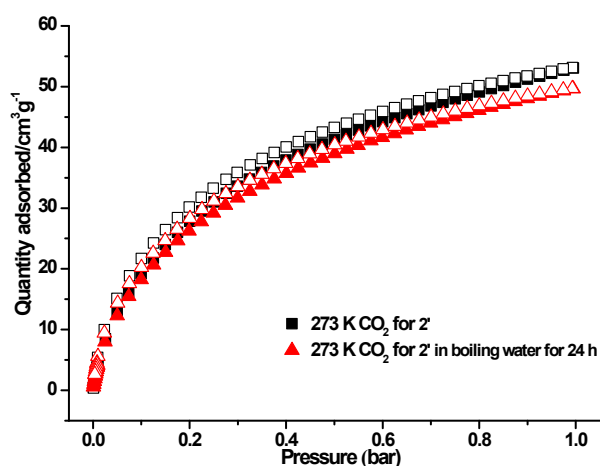

Fig S13. CO<sub>2</sub> sorption isotherms of 2' and 2' in boiling water for 24 h.

### Calculations of CO<sub>2</sub>/CH<sub>4</sub> and CO<sub>2</sub>/N<sub>2</sub> selectivities based on IAST

The experimental isotherm data on pure component for CO<sub>2</sub>, N<sub>2</sub> and CH<sub>4</sub> were measured at temperatures of 273 and 298 K, which were fitted by single-site-Langmuir–Freundlich model (SSLF):

$$y = \frac{abx^{1-c}}{1 + bx^{1-c}}$$

The adsorption selectivities for binary mixtures of CO<sub>2</sub>/CH<sub>4</sub> and CO<sub>2</sub>/N<sub>2</sub>, defined by

$$S_{i/j} = \frac{x_i^*y_j}{x_j^*y_i}$$

were respectively calculated using the Ideal Adsorption Solution Theory (IAST). Where  $x_i$  is the mole fraction of component  $i$  in the adsorbed phase and  $y_i$  is the mole fraction of component  $i$  in the bulk.

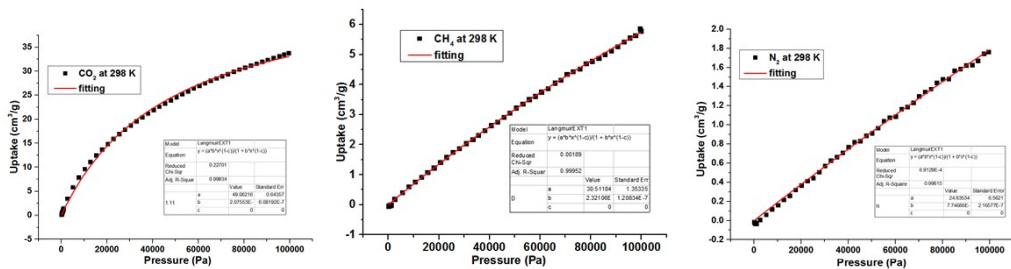

Fig. S14 single site Langmuir–Freundlich fitting for the sorption data of 2'.

### Calculation of sorption heat for CO<sub>2</sub> uptake using Virial model:

$$\ln P = \ln N + 1/T \sum_{i=0}^m aiN^i + \sum_{i=0}^n biN^i \quad Q_{st} = -R \sum_{i=0}^m aiN^i$$

The above equation was applied to fit the combined CO<sub>2</sub> isotherm data for 2' at 273 and 298 K, where  $P$  is the pressure,  $N$  is the adsorbed amount,  $T$  is the temperature,  $ai$  and  $bi$  are virial coefficients, and  $m$  and  $n$  are the number of coefficients used to describe the isotherms.  $Q_{st}$  is the coverage-dependent enthalpy of adsorption and  $R$  is the universal gas constant.

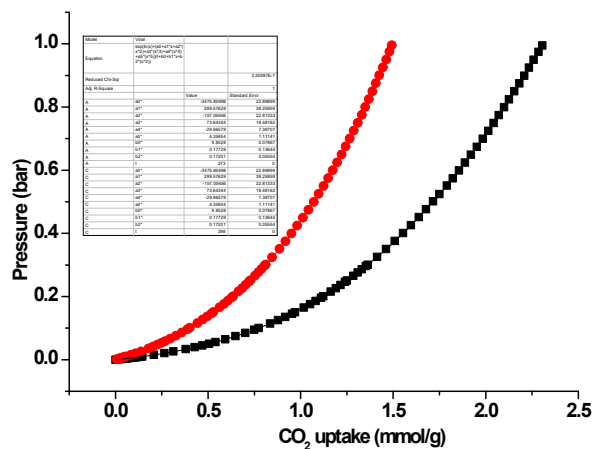

Fig. S15 CO<sub>2</sub> adsorption isotherms for 2' with fitting by Virial model.



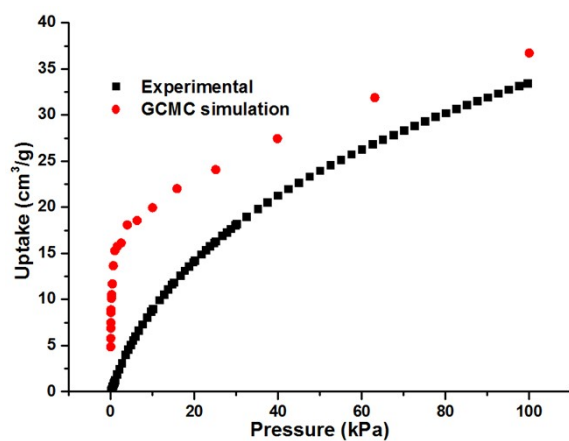

**Fig S16.** The experimental and simulated sorption isotherms of **2'**.

**Table S1.** Crystal data and structure refinement.

|                                             | <b>1</b>                                                                          | <b>2</b>                                                                        | <b>2(after Sorption)</b>                                                        |
|---------------------------------------------|-----------------------------------------------------------------------------------|---------------------------------------------------------------------------------|---------------------------------------------------------------------------------|
| Empirical formula                           | C <sub>48</sub> H <sub>58</sub> ClCu <sub>4</sub> N <sub>19</sub> O <sub>24</sub> | C <sub>48</sub> H <sub>56</sub> Cu <sub>4</sub> N <sub>18</sub> O <sub>24</sub> | C <sub>40</sub> H <sub>32</sub> Cu <sub>4</sub> N <sub>14</sub> O <sub>18</sub> |
| Formula weight                              | 1571.72                                                                           | 1523.25                                                                         | 1250.95                                                                         |
| Temperature/K                               | 293(2)                                                                            | 120(2)                                                                          | 298(3)                                                                          |
| Crystal system                              | tetragonal                                                                        | orthorhombic                                                                    | orthorhombic                                                                    |
| Space group                                 | <i>I4/mmm</i>                                                                     | <i>Pban</i>                                                                     | <i>Pban</i>                                                                     |
| a, Å                                        | 23.862(3)                                                                         | 13.7089(4)                                                                      | 26.3697(17)                                                                     |
| b, Å                                        | 23.862(3)                                                                         | 26.6171(6)                                                                      | 13.4790(12)                                                                     |
| c, Å                                        | 7.2102(14)                                                                        | 15.8127(4)                                                                      | 15.7382(6)                                                                      |
| α (deg)                                     | 90.00                                                                             | 90.00                                                                           | 90.00                                                                           |
| β(deg)                                      | 90.00                                                                             | 90.00                                                                           | 90.00                                                                           |
| γ(deg)                                      | 90.00                                                                             | 90.00                                                                           | 90.00                                                                           |
| V, Å <sup>3</sup>                           | 4105.5(11)                                                                        | 5769.9(3)                                                                       | 5593.9(7)                                                                       |
| Z                                           | 2                                                                                 | 4                                                                               | 4                                                                               |
| ρ <sub>calc</sub> / mg mm <sup>3</sup>      | 0.994                                                                             | 1.334                                                                           | 1.412                                                                           |
| μ/mm <sup>-1</sup>                          | 1.105                                                                             | 1.517                                                                           | 1.569                                                                           |
| collected/unique                            | 3327/1079                                                                         | 14848/5093                                                                      | 16485/4935                                                                      |
| GOF on F <sup>2</sup>                       | 1.175                                                                             | 1.105                                                                           | 1.150                                                                           |
| R <sub>1</sub> /wR <sub>2</sub> [I > 2σ(I)] | 0.0648, 0.1859                                                                    | 0.0550,0.1521                                                                   | 0.1254, 0.3315                                                                  |
| R <sub>1</sub> /wR <sub>2</sub> (all data)  | 0.0705, 0.1957                                                                    | 0.0620,0.1569                                                                   | 0.1414, 0.3427                                                                  |
| diff. peak/hole                             | 1.92/-0.63                                                                        | 1.10/-0.49                                                                      | 1.63/-1.27                                                                      |
